# Supplementary material for: Reconciling high-throughput gene essentiality data with metabolic network reconstructions
Source: PLoS Comput Biol. 2019 Apr 11;15(4):e1006507. doi: 10.1371/journal.pcbi.1006507 (PMC6478342; doi:10.1371/journal.pcbi.1006507)
Supplement: S8 Dataset — List of biomass precursors that cannot be synthesized when PA14 model predicted consensus essential genes are removed from the model. (XLS) [file pcbi.1006507.s008.xls]

## Sheet: Sheet3
Dataset_S8. Biomass precursors for PA14 model predicted consensus essential genes
Genes	Biomass Precursor
PA14_00290	Ubiquinol-9
PA14_00290	5-10-Methylenetetrahydrofolate
PA14_04310	Ubiquinol-9
PA14_04310	ATP
PA14_04310	5-10-Methylenetetrahydrofolate
PA14_04310	AMP
PA14_04310	CMP
PA14_04310	UMP
PA14_04310	dTMP
PA14_04310	dCMP
PA14_04310	dAMP
PA14_04310	dGMP
PA14_04310	clpn190cyc
PA14_04310	clpn170cyc
PA14_04310	pe170cyc
PA14_04310	pe190cyc
PA14_04310	pg170cyc
PA14_04310	pg190cyc
PA14_04580	5-10-Methylenetetrahydrofolate
PA14_04580	dTMP
PA14_07090	Ubiquinol-9
PA14_07090	clpn190cyc
PA14_07090	clpn170cyc
PA14_07090	pe170cyc
PA14_07090	pe190cyc
PA14_07090	pg170cyc
PA14_07090	pg190cyc
PA14_07130	Ubiquinol-9
PA14_07130	ATP
PA14_07130	5-10-Methylenetetrahydrofolate
PA14_07130	AMP
PA14_07130	dTMP
PA14_07130	dCMP
PA14_07130	dAMP
PA14_07130	GMP
PA14_07130	clpn190cyc
PA14_07130	clpn170cyc
PA14_07130	pe170cyc
PA14_07130	pe190cyc
PA14_07130	pg170cyc
PA14_07130	pg190cyc
PA14_07590	5-10-Methylenetetrahydrofolate
PA14_07910	Ubiquinol-9
PA14_07910	ATP
PA14_07910	5-10-Methylenetetrahydrofolate
PA14_07910	AMP
PA14_07910	CMP
PA14_07910	UMP
PA14_07910	dTMP
PA14_07910	dCMP
PA14_07910	dAMP
PA14_07910	dGMP
PA14_07910	clpn190cyc
PA14_07910	clpn170cyc
PA14_07910	pe170cyc
PA14_07910	pe190cyc
PA14_07910	pg170cyc
PA14_07910	pg190cyc
PA14_14820	Ubiquinol-9
PA14_14820	Phosphatidylglycerol_dihexadecanoyl
PA14_14820	Phosphatidylglycerol_dioctadecanoyl
PA14_14820	Pseudomonas aeruginosa Lipid A
PA14_14820	clpn160
PA14_14820	Phosphatidylglycerol_dihexadec-9-enoyl
PA14_14820	clpn161
PA14_14820	clpn180
PA14_14820	Phosphatidylglycerol_dioctadec-11-enoyl
PA14_14820	clpn181
PA14_14820	CMP
PA14_14820	Peptidoglycan polymer (n subunits)
PA14_14820	dCMP
PA14_14820	phosphatidylethanolamine_dihexadecanoyl
PA14_14820	phosphatidylethanolamine_dihexadec-9enoyl
PA14_14820	phosphatidylethanolamine_dioctadecanoyl
PA14_14820	phosphatidylethanolamine_dioctadec-11-enoyl
PA14_14820	clpn190cyc
PA14_14820	clpn170cyc
PA14_14820	pe170cyc
PA14_14820	pe190cyc
PA14_14820	pg170cyc
PA14_14820	pg190cyc
PA14_14880	Ubiquinol-9
PA14_15340	5-10-Methylenetetrahydrofolate
PA14_15340	dGMP
PA14_15340	GMP
PA14_16700	dAMP
PA14_16950	Peptidoglycan polymer (n subunits)
PA14_17130	Ubiquinol-9
PA14_17180	Pseudomonas aeruginosa Lipid A
PA14_17190	Phosphatidylglycerol_dioctadec-11-enoyl
PA14_17190	clpn181
PA14_17190	phosphatidylethanolamine_dioctadec-11-enoyl
PA14_17190	clpn190cyc
PA14_17190	pe190cyc
PA14_17190	pg190cyc
PA14_17210	Pseudomonas aeruginosa Lipid A
PA14_17270	Phosphatidylglycerol_dihexadecanoyl
PA14_17270	Phosphatidylglycerol_dioctadecanoyl
PA14_17270	Pseudomonas aeruginosa Lipid A
PA14_17270	clpn160
PA14_17270	Phosphatidylglycerol_dihexadec-9-enoyl
PA14_17270	clpn161
PA14_17270	clpn180
PA14_17270	Phosphatidylglycerol_dioctadec-11-enoyl
PA14_17270	clpn181
PA14_17270	phosphatidylethanolamine_dihexadecanoyl
PA14_17270	phosphatidylethanolamine_dihexadec-9enoyl
PA14_17270	phosphatidylethanolamine_dioctadecanoyl
PA14_17270	phosphatidylethanolamine_dioctadec-11-enoyl
PA14_17270	clpn190cyc
PA14_17270	clpn170cyc
PA14_17270	pe170cyc
PA14_17270	pe190cyc
PA14_17270	pg170cyc
PA14_17270	pg190cyc
PA14_17290	CMP
PA14_17290	dCMP
PA14_17340	Ubiquinol-9
PA14_23220	Ubiquinol-9
PA14_23320	dCMP
PA14_23560	Heme
PA14_23800	Peptidoglycan polymer (n subunits)
PA14_23860	Phosphatidylglycerol_dihexadecanoyl
PA14_23860	Phosphatidylglycerol_dioctadecanoyl
PA14_23860	Pseudomonas aeruginosa Lipid A
PA14_23860	clpn160
PA14_23860	Phosphatidylglycerol_dihexadec-9-enoyl
PA14_23860	clpn161
PA14_23860	clpn180
PA14_23860	Phosphatidylglycerol_dioctadec-11-enoyl
PA14_23860	clpn181
PA14_23860	phosphatidylethanolamine_dihexadecanoyl
PA14_23860	phosphatidylethanolamine_dihexadec-9enoyl
PA14_23860	phosphatidylethanolamine_dioctadecanoyl
PA14_23860	phosphatidylethanolamine_dioctadec-11-enoyl
PA14_23860	clpn190cyc
PA14_23860	clpn170cyc
PA14_23860	pe170cyc
PA14_23860	pe190cyc
PA14_23860	pg170cyc
PA14_23860	pg190cyc
PA14_25510	Pseudomonas aeruginosa Lipid A
PA14_25550	Peptidoglycan polymer (n subunits)
PA14_41400	Pseudomonas aeruginosa Lipid A
PA14_43690	Phosphatidylglycerol_dihexadecanoyl
PA14_43690	Phosphatidylglycerol_dioctadecanoyl
PA14_43690	Pseudomonas aeruginosa Lipid A
PA14_43690	clpn160
PA14_43690	Phosphatidylglycerol_dihexadec-9-enoyl
PA14_43690	clpn161
PA14_43690	clpn180
PA14_43690	Phosphatidylglycerol_dioctadec-11-enoyl
PA14_43690	clpn181
PA14_43690	phosphatidylethanolamine_dihexadecanoyl
PA14_43690	phosphatidylethanolamine_dihexadec-9enoyl
PA14_43690	phosphatidylethanolamine_dioctadecanoyl
PA14_43690	phosphatidylethanolamine_dioctadec-11-enoyl
PA14_43690	clpn190cyc
PA14_43690	clpn170cyc
PA14_43690	pe170cyc
PA14_43690	pe190cyc
PA14_43690	pg170cyc
PA14_43690	pg190cyc
PA14_51270	Peptidoglycan polymer (n subunits)
PA14_57330	Peptidoglycan polymer (n subunits)
PA14_57340	Peptidoglycan polymer (n subunits)
PA14_57370	Peptidoglycan polymer (n subunits)
PA14_57380	Peptidoglycan polymer (n subunits)
PA14_57390	Peptidoglycan polymer (n subunits)
PA14_57410	Peptidoglycan polymer (n subunits)
PA14_57810	Peptidoglycan polymer (n subunits)
PA14_61580	Heme
PA14_61660	Peptidoglycan polymer (n subunits)
PA14_61750	Ubiquinol-9
PA14_62120	phosphatidylethanolamine_dihexadecanoyl
PA14_62120	phosphatidylethanolamine_dihexadec-9enoyl
PA14_62120	phosphatidylethanolamine_dioctadecanoyl
PA14_62120	phosphatidylethanolamine_dioctadec-11-enoyl
PA14_62120	pe170cyc
PA14_62120	pe190cyc
PA14_64100	Phosphatidylglycerol_dihexadecanoyl
PA14_64100	Phosphatidylglycerol_dioctadecanoyl
PA14_64100	Pseudomonas aeruginosa Lipid A
PA14_64100	clpn160
PA14_64100	Phosphatidylglycerol_dihexadec-9-enoyl
PA14_64100	clpn161
PA14_64100	clpn180
PA14_64100	Phosphatidylglycerol_dioctadec-11-enoyl
PA14_64100	clpn181
PA14_64100	phosphatidylethanolamine_dihexadecanoyl
PA14_64100	phosphatidylethanolamine_dihexadec-9enoyl
PA14_64100	phosphatidylethanolamine_dioctadecanoyl
PA14_64100	phosphatidylethanolamine_dioctadec-11-enoyl
PA14_64100	clpn190cyc
PA14_64100	clpn170cyc
PA14_64100	pe170cyc
PA14_64100	pe190cyc
PA14_64100	pg170cyc
PA14_64100	pg190cyc
PA14_65500	phosphatidylethanolamine_dihexadecanoyl
PA14_65500	phosphatidylethanolamine_dihexadec-9enoyl
PA14_65500	phosphatidylethanolamine_dioctadecanoyl
PA14_65500	phosphatidylethanolamine_dioctadec-11-enoyl
PA14_65500	pe170cyc
PA14_65500	pe190cyc
PA14_69440	Heme
PA14_70440	5-10-Methylenetetrahydrofolate
PA14_70440	dGMP
PA14_73170	Pseudomonas aeruginosa Lipid A
PA14_73170	Peptidoglycan polymer (n subunits)
