# Supplementary material for: Reconciling high-throughput gene essentiality data with metabolic network reconstructions
Source: PLoS Comput Biol. 2019 Apr 11;15(4):e1006507. doi: 10.1371/journal.pcbi.1006507 (PMC6478342; doi:10.1371/journal.pcbi.1006507)
Supplement: S11 Dataset — Model predicted essential genes lists for PA14 growth simulated on LB media. Model predicted essential genes are marked with a ‘1’, while non-essential genes are marked with a ‘0’. (XLS) [file pcbi.1006507.s011.xls]

## Sheet: Dataset_S11.csv
Dataset_S11. PA14 model predicted essential genes for in silico screens for the updated PA14 model
Genes	LB_Model
PA14_43680	1
PA14_25660	1
PA14_23800	1
PA14_00290	1
PA14_03430	1
PA14_04580	1
PA14_43690	1
PA14_41350	1
PA14_25550	1
PA14_23310	1
PA14_17130	1
PA14_15310	1
PA14_14880	1
PA14_60330	1
PA14_61710	1
PA14_62940	1
PA14_20950	1
PA14_17190	1
PA14_17120	1
PA14_51270	1
PA14_30670	1
PA14_17270	1
PA14_64100	1
PA14_64110	1
PA14_23860	1
PA14_17030	1
PA14_71600	1
PA14_04310	1
PA14_04480	1
PA14_05620	1
PA14_07090	1
PA14_07130	1
PA14_07590	1
PA14_07910	1
PA14_08400	1
PA14_52580	1
PA14_52040	1
PA14_51240	1
PA14_49380	1
PA14_42760	1
PA14_41820	1
PA14_41400	1
PA14_39190	1
PA14_30110	1
PA14_25710	1
PA14_25650	1
PA14_25510	1
PA14_23920	1
PA14_23880	1
PA14_23560	1
PA14_23320	1
PA14_23220	1
PA14_21410	1
PA14_17420	1
PA14_17340	1
PA14_17290	1
PA14_17220	1
PA14_17210	1
PA14_17180	1
PA14_17080	1
PA14_16950	1
PA14_16700	1
PA14_15740	1
PA14_15340	1
PA14_14820	1
PA14_12060	1
PA14_11560	1
PA14_11550	1
PA14_11470	1
PA14_57260	1
PA14_57330	1
PA14_57340	1
PA14_57370	1
PA14_57380	1
PA14_57390	1
PA14_57410	1
PA14_57810	1
PA14_60470	1
PA14_61580	1
PA14_61660	1
PA14_61750	1
PA14_61770	1
PA14_62120	1
PA14_62830	1
PA14_62840	1
PA14_62850	1
PA14_63080	1
PA14_64200	1
PA14_64220	1
PA14_65230	1
PA14_65500	1
PA14_66550	1
PA14_66600	1
PA14_66610	1
PA14_66900	1
PA14_68980	1
PA14_69240	1
PA14_69440	1
PA14_69450	1
PA14_69690	1
PA14_70440	1
PA14_70720	1
PA14_70730	1
PA14_73170	1
PA14_73220	1
